# Supplementary material
Source: publisher figshare collection journal article supplement (https://tandf.figshare.com/articles/dataset/_/9975866)
Supplement: Supplementary file 1 [file 2]

Archive with 2 entries (2 files):
- tbsd_a_1679666_sm5216.pdf
- tbsd_a_1679666_sm5215.xlsx
