# Supplementary material
Source: publisher figshare collection journal article supplement (https://tandf.figshare.com/articles/dataset/_/9975866)
Supplement: Supplementary file 1 [file 2 › tbsd_a_1679666_sm5215.xlsx]

## Sheet: Sheet1
SUPPLEMENTAL FLE 1: ASPARTATE TRANSAMINASE (ATA) EXCEL© WORKSHEET FOR:												SECTION 1b			SECTION 2					SECTION 3						SECTION 4					SECTION 5						SECTION 6
												MSA-CONSENSUS- SITES (CNS) FROM SECTION 1a -THERE, CNS-ARE AUTO-EDIT BY ' ALIVEW', E.G., 'MINIMAL' VALUES IN CNS'S #1-36 ARE AUTO-OMITTED			ALIGNS OF CONSURF PROGRAM EVOLUTIONARY CONSERVATION ZONE (CONZONE) DATA TO HOMOLOGOUS CNS POSITIONS					ALIGINING DATA TO THE SAME CNS REFERENCE SITE POSITIION USING THE SCAFFOLD, I.E., ALIGNMENT OF ATA CONSURF DATA TO THE SAME MSA ATA'S POSITION OF SECTION 1 IDENTIFIED (GRAY HILGT) BY JALVIEWHERE WITH BOTH HOMOLOGOUS SITE CONZONE DATA OF SECTION 2 AND THE ÅNGSTROMS FROM THYASARA PROGRAM						SUMMARY SECTIONS 2 AND 3: USING THE JALVIEW ATA OUTPUT FILE, THE COMBINED ASSOCIATIONS OF THE 392 RAAs WITH BOTH THE SAME CNS CONSURFAND YASARAPOSITONAL DATA OF SECTION 3					SUMMARY: SECTION 4 DATA SORTED BY CONZONE VALUE						CONSOLIDATION STAGES
Evolutionary conservation and structural localizations suggest a physical trace of metabolism’s progressive geochronological emergence
J. Dennis Pollacka*, David Gerardb, George I. Makhatadzec, Dennis K. Pearld*
This Supplemental File 1 worksheet is a more detailed account of the construction of Recovered-Amino Acids (RAAs). It begins with a disgrammatic flow graphic of the major steps and follows with the originating MSA below (Section 1a). This file is an Excel© worksheet for one of our studies 20 earliest geochronologically characterized enzymes of 'Epoch I': aspartate transaminase (ATA) enzyme, #6 in…																																					A: ÅNGS AND CZONE AT SAME CNS (FROM SECTION 5)				B: RE-SORT BY BOTH CNS-AMINO ACIDS AND CONZONE				C: REARRANGEMENT: ADD % OCCUPANCYS AND ALIGN, ADD THEN CZONE ÅNGS TO FORM 'RAA' TETRAD*
												CNS	CNS AA		CONSURF OUTPUTS					IDENTIFIED IN JALVIEW		CONSENSUS AA AT CNS COMMON WITH HOMOLOGOUS ATA REF SITE	CONSURF'S CONZONE ASSIGNMENT	ÅNGS TO C/AC ANCHOR-ATOM FROM THE Cɑ AT SAME REFERENCE CNS BY YASARA		ID CNS SCAFF'S HOMOL REF-ERENCE POSITIONS IN THEIR MSA	CON-SENSUS AMINO ACID AT CNS	ASSOC CONZONE VALUE (SECTION 3,X)	ÅNGS TO C/AC FROM Cɑs FOUND AT SAME CNS POSITION (SECTION 3,Y)		ID CNS SCAFF'S HOMOL REF-ERENCE POSITIONS IN THEIR MSA	CON-SENSUS AMINO ACID AT CNS	SCAFFOLD AAs AT SAME CNS - FOR FERERENCE ONLY	CON- ZONE	ÅNGS TO C/AC FROM Cɑs FOUND AT SAME CNS POSITION		CON- SENSUS AMINO ACID AT CNS	CON- ZONE	CZONE ÅNGS FROM ITS Cɑs TO ITS ENZY ANCHOR- ATOM AT CNS'S PREV ASSIGNED SCAFFOLD AND % OCC		CONSENSUS CONZONE AAs AT SAME CNS SCAFFOLD' REFERENCE POSITION	CON-ZONE	ÅNGSTROMS (FROM COLUMN AN)		CON- ZONE	CONSENSUS CONZONE AAs AT SAME CNS SCAFFOLD' REFERENCE POSITION	ÅNGSTROMS (FROM COLUMN AN/AR + SD)	% OCCUPANCY
															CONSURF PRO-GRAM'S SITE	ALIGNS AT CNS POSITION	CONSURF'S AMINO ACID	CONSURF'S CONZONE ASSIGNMENT		ID CNS SCAFF'S HOMOL REF-ERENCE POSITION IN MSA	AA AT THE ATA SCAFFOLD'S REFERENCE POSITION IN MSA																											n	AVERAGE CONZONE RAA % OCC
												37	M		1	37	M	7		37	M	M	7	35.769		37	M	7	35.769		81	G	G	9	6.606		G	9	6.606		A	9	18.41		9	A	18.41
												38	F		2	38	F	5		38	F	F	5	32.326		38	F	5	32.326		83	Y	Y	9	9.543		Y	9	9.543		A	9	5.553		9	A	5.553
												39	E		3	39	E	3		39	E	E	3	33.795		39	E	3	33.795		127	Y	Y	9	26.317		Y	9	26.317		A	9	24.405		9	A	24.405
												40	N		4	40	N	1		40	N	N	1	34.136		40	N	1	34.136		132	G	G	9	20.288		G	9	20.288		A	9	19.155		9	A	19.155	4	11.7647
												41	I		5	41	I	6		41	I	I	6	33.181		41	I	6	33.181		164	G	G	9	8.569		G	9	8.569		C	9	11.663		9	C	11.663	1	2.94118
												42	T		6	42	T	1		42	T	T	1	29.579		42	T	1	29.579		173	A	A	9	18.41		A	9	18.41		D	9	9.674		9	D	9.674	1	2.94118
												43	A		7	43	A	4		43	A	A	4	27.2		43	A	4	27.2		194	P	P	9	15.591		P	9	15.591		G	9	6.606		9	G	6.606
												44	-		8	44	-	-		44	-	-	-	-		52	A	8	24.517		199	H	H	9	12.022		H	9	12.022		G	9	20.288		9	G	20.288
												45	-		9	45	-	-		45	-	-	-	-		53	P	6	22.296		262	G	G	9	11.861		G	9	11.861		G	9	8.569		9	G	8.569
												46	-		10	46	-	-		46	-	-	-	-		54	A	7	18.725		264	C	C	9	11.663		C	9	11.663		G	9	11.861		9	G	11.861
												47	-		11	47	-	-		47	-	-	-	-		58	D	6	15.049		266	N	N	9	9.31		N	9	9.31		G	9	13.26		9	G	13.26
												48	-		12	48	-	-		48	-	-	-	-		59	P	6	14.948		267	P	P	9	11.226		P	9	11.226		G	9	11.1		9	G	11.1
												49	E		13	49	-	-		49	-	E	-	-		60	I	7	12.454		269	G	G	9	13.26		G	9	13.26		G	9	10.383		9	G	10.383
												50	G		14	50	-	-		50	-	G	-	-		61	L	5	16.012		299	D	D	9	9.674		D	9	9.674		G	9	18.556		9	G	18.556
												51	G		15	51	-	-		51	-	G	-	-		62	G	4	16.789		301	A	A	9	5.553		A	9	5.553		G	9	14.984		9	G	14.984	9	26.4706
												52	A		16	52	A	8		52	A	A	8	24.517		63	L	5	16.506		302	Y	Y	9	7.454		Y	9	7.454		H	9	12.022		9	H	12.022	1	2.94118
												53	P		17	53	P	6		53	P	P	6	22.296		64	A	7	16.036		335	S	S	9	7.249		S	9	7.249		I	9	15.156		9	I	15.156
												54	A		18	54	A	7		54	A	A	7	18.725		65	D	4	17.668		337	S	S	9	6.344		S	9	6.344		I	9	14.35		9	I	14.35	2	5.88235
												55	-		19	55	-	-		55	-	-	-	-		66	A	5	21.379		338	K	K	9	5.718		K	9	5.718		K	9	5.718		9	K	5.718	1	2.94118
												56	-		20	56	-	-		56	-	-	-	-		67	F	5	20.987		343	Y	Y	9	7.869		Y	9	7.869		M	9	10.837		9	M	10.837	1	2.94118
												57	F		21	57	F	-		57	-	F	-	-		68	R	5	23.525		344	G	N	9	11.1		G	9	11.1		N	9	9.31		9	N	9.31
												58	D		22	58	D	6		58	D	D	6	15.049		69	A	3	25.384		346	R	R	9	11.078		R	9	11.078		N	9	21.684		9	N	21.684	2	5.88235
												59	P		23	59	P	6		59	P	P	6	14.948		70	D	7	28.952		348	G	G	9	10.383		G	9	10.383		P	9	15.591		9	P	15.591
												60	I		24	60	I	7		60	I	I	7	12.454		71	E	1	29.53		379	A	A	9	24.405		A	9	24.405		P	9	11.226		9	P	11.226	2	5.88235
SECTION 1a												61	L		25	61	L	5		61	L	L	5	16.012		72	G	8	28.454		383	N	N	9	21.684		N	9	21.684		Q	9	17.781		9	Q	17.781	1	2.94118
												62	G		26	62	G	4		62	G	G	4	16.789		73	P	1	28.42		390	A	S	9	19.155		A	9	19.155		R	9	11.078		9	R	11.078
MUTIPLE SEQUENCE ALIGNMENT (MUSCLEa): ASPARTATE TRANSAMINASE (ATA), EC 2.6.1.1, of 152 BACTERIA SEQUENCES, INCLUDING PDB-1aam AS THE 'SCAFFOLD'. ATA IS #6 OF THE 20 'EPOCH I' ENZYMES OF TABLE 5A												63	L		27	63	L	5		63	L	L	5	16.506		74	D	2	25.169		420	I	I	9	15.156		I	9	15.156		R	9	14.862		9	R	14.862	2	5.88235
												64	A		28	64	A	7		64	A	A	7	16.036		75	K	8	23.43		421	Q	Q	9	17.781		Q	9	17.781		S	9	7.249		9	S	7.249
												65	D		29	65	D	4		65	D	D	4	17.668		76	I	7	19.667		456	M	M	9	10.837		M	9	10.837		S	9	6.344		9	S	6.344
												66	A		30	66	A	5		66	L	A	5	21.379		77	N	7	17.141		458	S	S	9	14.631		S	9	14.631		S	9	14.631		9	S	14.631	3	8.82353
												67	F		31	67	F	5		67	F	F	5	20.987		78	L	8	15.229		513	G	G	9	18.556		G	9	18.556		Y	9	9.543		9	Y	9.543
>MSA consensus: Muscleinput, 152 Bacteria sequences (≤5 unique species/genus, see: Text, Methods)												68	R		32	68	R	5		68	R	R	5	23.525		79	G	7	12.256		524	R	R	9	14.862		R	9	14.862		Y	9	26.317		9	Y	26.317
												69	A		33	69	A	3		69	A	A	3	25.384		80	I	8	10.37		525	I	V	9	14.35		I	9	14.35		Y	9	7.454		9	Y	7.454
-------------M--FSSPRSAMLMLPMMMARLSDMFENITA-----EGGAPA--FDPILGLADAFRADER										72		70	D		34	70	D	7		70	D	D	7	28.952		81	G	9	6.606		529	G	G	9	14.984		G	9	14.984		Y	9	7.869		9	Y	7.869	4	11.7647
PDKINLGIGVYGVLP-KDETGDTPVLTSVK------KAEQYLLENETTK----NYLGIDGIPEFRRATQELL										72		71	E		35	71	E	1		71	E	E	1	29.53		82	V	8	6.81												34		13.044			34	13.044	34	100
FGKDSGLIYDKRARTAQTPGGTGALRVAADFLAR----LTPGDRVWISNPSWPNHKAV--FNAAGL-EVVEY										72		72	R		36	72	R	8		72	R	G	8	28.454		83	Y	9	9.543																		13.044±
PYYDA----ANHGLDFD--GMLASLEAAIA-------PGDVVLLHGCCHNPTGIDPTAEQWQQLAELSV---										72		73	P		37	73	P	1		73	P	P	1	28.42		89	K	6	13.276																		5.35465
-EKGHWLPLFDFAYQGFARGLEEDA-EGLRAFAALH-DEL--IVASSYSKNFGLYGERVGACT--LVAADPE										72		74	D		38	74	D	2		74	G	D	2	25.169		90	D	6	16.695		52	A	A	8	24.517		A	8	24.517		A	8	24.517
TADRAFSQVKS----IIRANYSNPPAHGAAAVATILSNDALRAIWEQELTEM-RQR---IQRMRQLFVNTLQ										72		75	K		39	75	K	8		75	K	K	8	23.43		91	E	6	20.16		72	G	R	8	28.454		G	8	28.454		A	8	21.811		8	A	24.517
E----KGANQDFSIFI--IPQNGMFSFSGL-AGLIGKKTPAIRGKVIEDTKEQVLRLR-----EEFGVYAVP										72		76	I		40	76	I	7		76	I	I	7	19.667		92	T	2	20.817		75	K	K	8	23.43		K	8	23.43		A	8	12.072		8	A	21.811
SSAF-P--G-LNAGGHDHFRINVAGMTPDNMAPLCEAIVAVLARLRAVDAAIASIEAEKAAK										62		77	N		41	77	N	7		77	N	N	7	17.141		93	G	8	17.412		78	L	L	8	15.229		L	8	15.229		A	8	19.225		8	A	12.072
										566		78	L		42	78	L	8		78	L	L	8	15.229		94	D	6	16.581		80	I	I	8	10.37		I	8	10.37		A	8	17.285		8	A	19.225
												79	G		43	79	G	7		79	G	G	7	12.256		95	T	7	13.638		82	V	V	8	6.81		V	8	6.81		C	8	13.158		8	A	17.285	5	8.62069
References,re: SECTIONS 1a,b,2,3												80	I		44	80	I	8		80	I	I	8	10.37		96	P	6	15.504		93	G	G	8	17.412		G	8	17.412		C	8	26.534		8	C	13.158
												81	G		45	81	G	9		81	G	G	9	6.606		97	V	8	16.37		97	V	V	8	16.37		V	8	16.37		D	8	21.112		8	C	26.534	2	3.44828
1.a,b 'MUSCLE': Edgar, R. C. (2004). MUSCLE:multiple sequence alignment with high accuracy and high through-put. Nucleic Acids Research, 32(5), 1792-1797												82	V		46	82	V	8		82	V	V	8	6.81		98	L	8	16.54		98	L	L	8	16.54		L	8	16.54		D	8	25.637		8	D	21.112
												83	Y		47	83	Y	9		83	Y	Y	9	9.543		99	T	2	20.051		101	V	V	8	17.525		V	8	17.525		D	8	25.119		8	D	25.637
												84	G		48	84	-	-		84	-	-	-	-		100	S	5	19.337		110	A	A	8	21.811		A	8	21.811		E	8	21.91		8	D	25.119	3	5.17241
1.b 'JALVIEW' : Waterhouse, A. M., Proctor, J. B., Martin, D. M. A., Clamp, M. & Barton, G. J. (2009). Jalview Version 2 - a multiple sequence alignment editor and analysis workbench. Bioinformatics 25(9), 1189-1191 doi:10.1093/bioinformatics/btp033												85	V		49	85	-	-		85	-	-	-	-		101	V	8	17.525		111	E	E	8	21.91		E	8	21.91		E	8	28.183		8	E	21.91
												86	L		50	86	-	-		86	-	-	-	-		102	K	5	20.713		114	L	L	8	25.091		L	8	25.091		E	8	24.737		8	E	28.183
												87	P		51	87	-	-		87	-	-	-	-		109	K	2	23.107		118	E	E	8	28.183		E	8	28.183		E	8	32.558		8	E	24.737
2. 'CONSURF': Ashkenazy, H., Abadi, S., Martz, E., Chay, O., Mayrose, I., Pupko, T. & Ben-Tal, N. (2016). ConSurf 2016:an improved methodology to estimate and visualize evolutionary conservation in macromolecules. Nucleic Acids Research, 44 doi:10.1093/nar/gkw408												88	-		52	88	-	-		88	-	-	-	-		110	A	8	21.811		136	L	F	8	18.772		L	8	18.772		E	8	28.384		8	E	32.558
												89	K		53	89	K	6		89	K	K	6	13.276		111	E	8	21.91		140	T	T	8	16.726		T	8	16.726		F	8	11.188		8	E	28.384	5	8.62069
												90	D		54	90	D	6		90	D	D	6	16.695		112	Q	2	25.558		161	Q	Q	8	16.364		Q	8	16.364		G	8	28.454		8	F	11.188	1	1.72414
												91	E		55	91	E	6		91	E	E	6	20.16		113	Y	1	26.226		165	G	G	8	8.07		G	8	8.07		G	8	17.412		8	G	28.454
												92	T		56	92	T	2		92	T	T	2	20.817		114	L	8	25.091		166	T	T	8	7.811		T	8	7.811		G	8	8.07		8	G	17.412
3. 'YASARA': Krieger E., & Vriend, G. (2014). YASARA view – molecular graphics for all devices – from smartphones to workstations. Bioinformatics, 30(20), 2981-2982												93	G		57	93	G	8		93	G	G	8	17.412		115	L	5	26.921		168	A	A	8	12.072		A	8	12.072		G	8	14.718		8	G	8.07
												94	D		58	94	K	6		94	K	D	6	16.581		116	E	1	30.181		174	D	D	8	21.112		D	8	21.112		G	8	11.15		8	G	14.718
												95	T		59	95	T	7		95	T	T	7	13.638		117	N	1	29.652		187	D	K	8	25.637		D	8	25.637		H	8	10.478		8	G	11.15	5
												96	P		60	96	P	6		96	P	P	6	15.504		118	E	8	28.183		192	S	S	8	16.726		S	8	16.726		I	8	10.37		8	H	10.478	1	1.72414
												97	V		61	97	V	8		97	V	V	8	16.37		119	T	2	31.225		196	W	W	8	9.599		W	8	9.599		I	8	26.663		8	I	10.37
												98	L		62	98	L	8		98	L	L	8	16.54		120	T	7	29.678		197	P	P	8	11.972		P	8	11.972		K	8	23.43		8	I	26.663	2	3.44828
												99	T		63	99	T	2		99	Y	T	2	20.051		121	K	7	26.861		198	N	N	8	10.591		N	8	10.591		L	8	15.229		8	K	23.43	1	1.72414
												100	S		64	100	S	5		100	S	S	5	19.337		126	N	6	28.32		216	Y	Y	8	21.631		Y	8	21.631		L	8	16.54		8	L	15.229
												101	V		65	101	V	8		101	V	V	8	17.525		127	Y	9	26.317		241	L	L	8	24.159		L	8	24.159		L	8	25.091		8	L	16.54
												102	K		66	102	E	5		102	K	K	5	20.713		128	L	7	23.939		256	D	D	8	25.119		D	8	25.119		L	8	18.772		8	L	25.091
												103	-		67	103	-	-		103	-	A	-	-		129	P	4	24.554		263	C	C	8	13.158		C	8	13.158		L	8	24.159		8	L	18.772
												104	-		68	104	-	-		104		E				130	I	7	23.005		265	H	H	8	10.478		H	8	10.478		L	8	10.169		8	L	24.159
												105	-		69	105	-	-		105	-	I	-	-		131	D	3	21.281		268	T	T	8	13.781		T	8	13.781		L	8	20.468		8	L	10.169
												106	-		70	106	-	-		106		A				132	G	9	20.288		276	Q	Q	8	24.565		Q	8	24.565		L	8	24.666		8	L	20.468
												107	-		71	107	-	-		107	-	Q	-	-		133	I	2	21.586		327	E	E	8	24.737		E	8	24.737		M	8	17.858		8	L	24.666	8	13.7931
												108	-		72	108	-	-		108	-	-	-	-		134	P	2	23.058		334	S	S	8	9.569		S	8	9.569		N	8	10.591		8	M	17.858	1	1.72414
												109	K		73	109	K	2		109	K	K	2	23.107		135	E	3	22.45		339	N	N	8	9.205		N	8	9.205		N	8	9.205		8	N	10.591
												110	A		74	110	A	8		110	A	A	8	21.811		136	L	8	18.772		342	L	L	8	10.169		L	8	10.169		P	8	11.972		8	N	9.205	2	3.44828
												111	E		75	111	E	8		111	E	E	8	21.91		137	R	6	19.387		378	R	R	8	24.067		R	8	24.067		P	8	18.008		8	P	11.972
												112	Q		76	112	Q	2		112	Q	Q	2	25.558		138	R	1	22.119		382	S	S	8	23.073		S	8	23.073		P	8	18.758		8	P	18.008
												113	Y		77	113	Y	1		113	Y	Y	1	26.226		139	A	7	19.981		385	P	P	8	18.008		P	8	18.008		Q	8	16.364		8	P	18.758	3	5.17241
												114	L		78	114	L	8		114	L	L	8	25.091		140	T	8	16.726		388	G	G	8	14.718		G	8	14.718		Q	8	24.565		8	Q	16.364
												115	L		79	115	L	5		115	L	L	5	26.921		141	Q	5	19.283		393	A	A	8	19.225		A	8	19.225		Q	8	23.268		8	Q	24.565
												116	E		80	116	E	1		116	E	E	1	30.181		142	E	1	20.805		396	L	L	8	20.468		L	8	20.468		R	8	24.067		8	Q	23.268	3	5.17241
												117	N		81	117	N	1		117	N	N	1	29.652		143	L	7	17.471		397	S	S	8	23.891		S	8	23.891		S	8	16.726		8	R	24.067	1	1.72414
												118	E		82	118	E	8		118	E	E	8	28.183		144	L	4	16.535		425	Q	Q	8	23.268		Q	8	23.268		S	8	9.569		8	S	16.726
												119	T		83	119	T	2		119	T	T	2	31.225		145	F	3	19.831		433	E	E	8	32.558		E	8	32.558		S	8	23.073		8	S	9.569
												120	T		84	120	T	7		120	T	T	7	29.678		146	G	5	22.523		455	G	G	8	11.15		G	8	11.15		S	8	23.891		8	S	23.073
												121	K		85	121	K	7		121	K	K	7	26.861		147	K	1	24.949		457	F	F	8	11.188		F	8	11.188		T	8	16.726		8	S	23.891	4	6.89655
												122	-		86	122	-	-		122	-	D	-	-		148	D	1	28.42		490	L	R	8	24.666		L	8	24.666		T	8	7.811		8	T	16.726
												123	-		87	123	-	-		123	-	A	-	-		149	S	4	27.359		496	E	E	8	28.384		E	8	28.384		T	8	13.781		8	T	7.811
												124	-		88	124	-	-		124	-	L	-	-		150	G	1	28.867		501	Y	Y	8	19.32		Y	8	19.32		V	8	6.81		8	T	13.781	3	5.17241
												125	-		89	125	-	-		125		C	-			151	L	2	26.075		502	A	A	8	17.285		A	8	17.285		V	8	16.37		8	V	6.81
												126	N		90	126	N	6		126	N	N	6	28.32		152	I	2	25.765		504	P	A	8	18.758		P	8	18.758		V	8	17.525		8	V	16.37
												127	Y		91	127	Y	9		127	Y	Y	9	26.317		153	Y	1	29.578		527	V	V	8	14.471		V	8	14.471		V	8	14.471		8	V	17.525
												128	L		92	128	L	7		128	L	L	7	23.939		154	D	1	30.244		530	M	M	8	17.858		M	8	17.858		V	8	30.16		8	V	14.471
												129	G		93	129	G	4		129	G	P	4	24.554		155	K	1	28.075		539	C	C	8	26.534		C	8	26.534		W	8	9.599		8	V	30.16	5	8.62069
												130	I		94	130	I	7		130	I	I	7	23.005		156	R	4	27.054		542	I	I	8	26.663		I	8	26.663		Y	8	21.631		8	W	9.599	1	1.72414
												131	D		95	131	D	3		131	D	D	3	21.281		157	A	6	23.617		543	V	V	8	30.16		V	8	30.16		Y	8	19.32		8	Y	21.631
												132	G		96	132	G	9		132	G	G	9	20.288		158	R	4	22.83												58		18.645		8	Y	19.32	2	3.44828
												133	I		97	133	I	2		133	I	I	2	21.586		159	T	7	19.645																	58	18.645±	58	100
												134	P		98	134	P	2		134	P	P	2	23.058		160	A	5	17.998																		6.51731
												135	E		99	135	E	3		135	E	E	3	22.45		161	Q	8	16.364		37	M	M	7	35.769		M	7	35.769
												136	F		100	136	F	8		136	F	L	8	18.772		162	T	7	13.804		54	A	A	7	18.725		A	7	18.725		A	7	18.725		7	A	18.725
												137	R		101	137	G	6		137	G	R	6	19.387		163	P	6	12.194		60	I	I	7	12.454		I	7	12.454		A	7	16.036		7	A	16.036
												138	R		102	138	R	1		138	R	R	1	22.119		164	G	9	8.569		64	A	A	7	16.036		A	7	16.036		A	7	19.981		7	A	19.981
												139	A		103	139	C	7		139	C	A	7	19.981		165	G	8	8.07		70	D	D	7	28.952		D	7	28.952		A	7	16.769		7	A	16.769
												140	T		104	140	T	8		140	T	T	8	16.726		166	T	8	7.811		76	I	I	7	19.667		I	7	19.667		A	7	24.223		7	A	24.223
												141	Q		105	141	Q	5		141	Q	Q	5	19.283		167	G	7	11.009		77	N	N	7	17.141		N	7	17.141		A	7	13.292		7	A	13.292
												142	E		106	142	E	1		142	E	E	1	20.805		168	A	8	12.072		79	G	G	7	12.256		G	7	12.256		A	7	15.789		7	A	15.789	7	10.7692
												143	L		107	143	L	7		143	L	L	7	17.471		169	L	7	12.066		95	T	T	7	13.638		T	7	13.638		D	7	28.952		7	D	28.952
												144	L		108	144	L	4		144	L	L	4	16.535		170	R	6	14.816		120	T	T	7	29.678		T	7	29.678		D	7	16.608		7	D	16.608	2	3.07692
												145	F		109	145	F	3		145	F	F	3	19.831		171	V	6	16.399		121	K	K	7	26.861		K	7	26.861		E	7	13.127		7	E	13.127
												146	G		110	146	G	5		146	G	G	5	22.523		172	A	7	16.769		128	L	L	7	23.939		L	7	23.939		E	7	27.575		7	E	27.575	2	3.07692
												147	K		111	147	K	1		147	K	K	1	24.949		173	A	9	18.41		130	I	I	7	23.005		I	7	23.005		F	7	25.045		7	F	25.045
												148	D		112	148	G	1		148	G	D	1	28.42		174	D	8	21.112		139	A	C	7	19.981		A	7	19.981		F	7	13.474		7	F	13.474
												149	S		113	149	S	4		149	S	S	4	27.359		175	F	5	22.075		143	L	L	7	17.471		L	7	17.471		F	7	9.017		7	F	9.017
												150	G		114	150	A	1		150	A	G	1	28.867		176	L	4	22.616		159	T	T	7	19.645		T	7	19.645		F	7	12.029		7	F	12.029
												151	L		115	151	L	2		151	L	L	2	26.075		177	A	7	24.223		162	T	T	7	13.804		T	7	13.804		F	7	10.844		7	F	10.844
												152	I		116	152	I	2		152	I	I	2	25.765		178	T	5	27.069		167	G	G	7	11.009		G	7	11.009		F	7	24.766		7	F	24.766
												153	Y		117	153	N	1		153	N	Y	1	29.578		183	L	4	28.337		169	L	L	7	12.066		L	7	12.066		F	7	16.336		7	F	16.336	7	10.7692
												154	D		118	154	D	1		154	D	D	1	30.244		184	N	5	27.062		172	A	A	7	16.769		A	7	16.769		G	7	12.256		7	G	12.256
												155	K		119	155	K	1		155	K	K	1	28.075		185	P	1	28.499		177	A	A	7	24.223		A	7	24.223		G	7	11.009		7	G	11.009
												156	R		120	156	R	4		156	R	R	4	27.054		186	G	5	25.406		189	V	V	7	19.902		V	7	19.902		G	7	23.693		7	G	23.693
												157	A		121	157	A	6		157	A	A	6	23.617		187	D	8	25.637		190	W	W	7	20.019		W	7	20.019		G	7	13.562		7	G	13.562
												158	R		122	158	R	4		158	R	R	4	22.83		188	E	6	23.355		191	I	V	7	17.153		I	7	17.153		G	7	9.979		7	G	9.979
												159	T		123	159	T	7		159	T	T	7	19.645		189	V	7	19.902		209	G	G	7	23.693		G	7	23.693		G	7	22.518		7	G	22.518	6	9.23077
												160	A		124	160	A	5		160	A	A	5	17.998		190	W	7	20.019		210	L	L	7	22.556		L	7	22.556		H	7	12.017		7	H	12.017	1	1.53846
												161	Q		125	161	Q	8		161	Q	Q	8	16.364		191	I	7	17.153		232	F	F	7	25.045		F	7	25.045		I	7	12.454		7	I	12.454
												162	T		126	162	T	7		162	T	T	7	13.804		192	S	8	16.726		258	V	V	7	18.824		V	7	18.824		I	7	19.667		7	I	19.667
												163	P		127	163	P	6		163	P	P	6	12.194		193	N	6	17.412		261	H	H	7	12.017		H	7	12.017		I	7	23.005		7	I	23.005
												164	G		128	164	G	9		164	G	G	9	8.569		194	P	9	15.591		271	D	D	7	16.608		D	7	16.608		I	7	17.153		7	I	17.153	4	6.15385
												165	G		129	165	G	8		165	G	G	8	8.07		195	S	6	13.061		272	P	P	7	19.462		P	7	19.462		K	7	26.861		7	K	26.861
												166	T		130	166	T	8		166	T	T	8	7.811		196	W	8	9.599		277	W	W	7	22.214		W	7	22.214		K	7	23.837		7	K	23.837	2	3.07692
												167	G		131	167	G	7		167	G	G	7	11.009		197	P	8	11.972		280	L	L	7	25.118		L	7	25.118		L	7	23.939		7	L	23.939
												168	A		132	168	A	8		168	A	A	8	12.072		198	N	8	10.591		284	S	S	7	26.091		S	7	26.091		L	7	17.471		7	L	17.471
												169	L		133	169	L	7		169	L	L	7	12.066		199	H	9	12.022		294	W	W	7	25.487		W	7	25.487		L	7	12.066		7	L	12.066
												170	R		134	170	R	6		170	R	R	6	14.816		200	P	4	15.581		296	P	P	7	19.839		P	7	19.839		L	7	22.556		7	L	22.556
												171	V		135	171	V	6		171	V	V	6	16.399		201	A	5	15.561		298	F	F	7	13.474		F	7	13.474		L	7	25.118		7	L	25.118
												172	A		136	172	A	7		172	A	A	7	16.769		202	V	6	14.415		300	F	F	7	9.017		F	7	9.017		L	7	25.063		7	L	25.063	6	9.23077
												173	A		137	173	A	9		173	A	A	9	18.41		205	F	6	16.724		303	Q	Q	7	11.085		Q	7	11.085		M	7	35.769		7	M	35.769	1	1.53846
												174	D		138	174	D	8		174	D	D	8	21.112		206	N	1	19.865		304	G	G	7	13.562		G	7	13.562		N	7	17.141		7	N	17.141	1	1.53846
												175	F		139	175	F	5		175	F	F	5	22.075		207	A	3	19.032		305	F	F	7	12.029		F	7	12.029		P	7	19.462		7	P	19.462
												176	L		140	176	L	4		176	L	L	4	22.616		208	A	6	21.668		332	V	V	7	14.465		V	7	14.465		P	7	19.839		7	P	19.839
												177	A		141	177	A	7		177	A	A	7	24.223		209	G	7	23.693		336	Y	Y	7	8.469		Y	7	8.469		P	7	18.41		7	P	18.41	3	4.61538
												178	R		142	178	K	5		178	K	T	5	27.069		210	L	7	22.556		340	F	F	7	10.844		F	7	10.844		Q	7	11.085		7	Q	11.085	1	1.53846
												179	-		143	179	-	-		179	-	Y	-	-		212	E	1	21.885		341	G	G	7	9.979		G	7	9.979		R	7	20.537		7	R	20.537
												180	-		144	180	-	-		180	-	D	-	-		213	V	6	19.543		345	E	E	7	13.127		E	7	13.127		R	7	14.869		7	R	14.869
												181	-		145	181	-	-		181	-	N	-	-		214	V	4	21.484		347	V	V	7	10.793		V	7	10.793		R	7	19.744		7	R	19.744	3	4.61538
												182	-		146	182	-	-		182	-	T	-	-		215	E	1	19.974		349	A	A	7	13.292		A	7	13.292		S	7	26.091		7	S	26.091
												183	L		147	183	N	4		183	N	L	4	28.337		216	Y	8	21.631		366	F	F	7	24.766		F	7	24.766		S	7	25.442		7	S	25.442
												184	T		148	184	T	5		184	T	N	5	27.062		217	P	1	22.216		371	S	A	7	25.442		S	7	25.442		S	7	19.227		7	S	19.227	3	4.61538
												185	P		149	185	S	1		185	S	P	1	28.499		218	Y	4	19.352		381	Y	Y	7	20.507		Y	7	20.507		T	7	13.638		7	T	13.638
												186	G		150	186	V	5		186	V	G	5	25.406		219	Y	1	19.953		384	P	P	7	18.41		P	7	18.41		T	7	29.678		7	T	29.678
												187	D		151	187	K	8		187	K	D	8	25.637		220	D	3	23.596		389	A	A	7	15.789		A	7	15.789		T	7	19.645		7	T	19.645
												188	R		152	188	R	6		188	R	E	6	23.355		221	A	4	23.618		392	V	V	7	15.915		V	7	15.915		T	7	13.804		7	T	13.804	4	6.15385
												189	V		153	189	V	7		189	V	V	7	19.902		226	A	1	26.848		402	R	R	7	20.537		R	7	20.537		V	7	19.902		7	V	19.902
												190	W		154	190	W	7		190	W	W	7	20.019		227	N	3	26.322		414	R	R	7	14.869		R	7	14.869		V	7	18.824		7	V	18.824
												191	I		155	191	V	7		191	V	I	7	17.153		228	H	5	22.576		424	R	R	7	19.744		R	7	19.744		V	7	14.465		7	V	14.465
												192	S		156	192	S	8		192	S	S	8	16.726		230	L	5	21.194		459	F	F	7	16.336		F	7	16.336		V	7	10.793		7	V	10.793
												193	N		157	193	N	6		193	N	N	6	17.412		231	D	5	23.961		460	S	S	7	19.227		S	7	19.227		V	7	15.915		7	V	15.915
												194	P		158	194	P	9		194	P	P	9	15.591		232	F	7	25.045		461	G	G	7	22.518		G	7	22.518		V	7	22.749		7	V	22.749
												195	S		159	195	S	6		195	S	S	6	13.061		233	D	5	28.292		483	K	K	7	23.837		K	7	23.837		V	7	15.881		7	V	15.881	7	10.7692
												196	W		160	196	W	8		196	W	W	8	9.599		236	G	4	26.692		486	V	V	7	22.749		V	7	22.749		W	7	20.019		7	W	20.019
												197	P		161	197	P	8		197	P	P	8	11.972		237	M	6	23.758		487	L	L	7	25.063		L	7	25.063		W	7	22.214		7	W	22.214
												198	N		162	198	N	8		198	N	N	8	10.591		238	L	3	26.314		503	V	V	7	15.881		V	7	15.881		W	7	25.487		7	W	25.487	3	4.61538
												199	H		163	199	H	9		199	H	H	9	12.022		239	A	1	28.304		536	E	A	7	27.575		E	7	27.575		Y	7	8.469		7	Y	8.469
												200	K		164	200	K	4		200	K	P	4	15.581		240	S	5	26.628												Y	7	20.507		7	Y	20.507	2	3.07692
												201	A		165	201	S	5		201	S	A	5	15.561		241	L	8	24.159												65		18.714			65	18.714	65	100
												202	V		166	202	V	6		202	V	V	6	14.415		242	E	1	27.082																		18.714±
												203	-		167	203	-	'-		203	-	I	-	-		243	A	1	28.899		41	I	I	6	33.181		I	6	33.181								5.79188
												204	-		168	204	-	-		204	-	G	-	-		244	A	6	28.684		53	P	P	6	22.296		P	6	22.296
												205	F		169	205	F	6		205	F	F	6	16.724		245	I	4	29.737		58	D	D	6	15.049		D	6	15.049		A	6	23.617		6	A	23.617
												206	N		170	206	N	1		206	N	N	1	19.865		246	T	6	29.8		59	P	P	6	14.948		P	6	14.948		A	6	21.668		6	A	21.668
												207	A		171	207	S	3		207	S	A	3	19.032		255	G	5	27.96		89	K	K	6	13.276		K	6	13.276		A	6	28.684		6	A	28.684
												208	A		172	208	A	6		208	A	A	6	21.668		256	D	8	25.119		90	D	D	6	16.695		D	6	16.695		A	6	24.804		6	A	24.804
												209	G		173	209	G	7		209	G	G	7	23.693		257	V	6	21.626		91	E	E	6	20.16		E	6	20.16		A	6	15.926		6	A	15.926
												210	L		174	210	L	7		210	L	L	7	22.556		258	V	7	18.824		94	D	K	6	16.581		D	6	16.581		A	6	22.667		6	A	22.667
												211	-		175	211	-	-		211	-	-	-	-		259	L	6	15.287		96	P	P	6	15.504		P	6	15.504		A	6	11.584		6	A	11.584
												212	E		176	212	E	1		212	E	E	1	21.885		260	L	5	14.909		126	N	N	6	28.32		N	6	28.32		A	6	25.764		6	A	25.764
												213	V		177	213	V	6		213	V	V	6	19.543		261	H	7	12.017		137	R	G	6	19.387		R	6	19.387		A	6	33.632		6	A	33.632
												214	V		178	214	R	4		214	R	V	4	21.484		262	G	9	11.861		157	A	A	6	23.617		A	6	23.617		A	6	12.832		6	A	12.832	10	17.2414
												215	E		179	215	E	1		215	E	E	1	19.974		263	C	8	13.158		163	P	P	6	12.194		P	6	12.194		D	6	15.049		6	D	15.049
												216	Y		180	216	Y	8		216	Y	Y	8	21.631		264	C	9	11.663		170	R	R	6	14.816		R	6	14.816		D	6	16.695		6	D	16.695
												217	P		181	217	A	1		217	A	P	1	22.216		265	H	8	10.478		171	V	V	6	16.399		V	6	16.399		D	6	16.581		6	D	16.581
												218	Y		182	218	Y	4		218	Y	Y	4	19.352		266	N	9	9.31		188	E	R	6	23.355		E	6	23.355		D	6	23.961		6	D	23.961	4	6.89655
												219	Y		183	219	Y	1		219	Y	Y	1	19.953		267	P	9	11.226		193	N	N	6	17.412		N	6	17.412		E	6	20.16		6	E	20.16
												220	D		184	220	D	3		220	D	D	3	23.596		268	T	8	13.781		195	S	S	6	13.061		S	6	13.061		E	6	23.355		6	E	23.355	2	3.44828
												221	A		185	221	A	4		221	A	A	4	23.618		269	G	9	13.26		202	V	V	6	14.415		V	6	14.415		F	6	16.724		6	F	16.724
												222	-		186	222				222	-	I	-	-		270	I	6	15.778		205	F	F	6	16.724		F	6	16.724		F	6	25.819		6	F	25.819	2	3.44828
												223	-		187	223				223	-	E	-	-		271	D	7	16.608		208	A	A	6	21.668		A	6	21.668		G	6	29.107		6	G	29.107
												224	-		188	224				224	-	L	-	-		272	P	7	19.462		213	V	V	6	19.543		V	6	19.543		G	6	18.155		6	G	18.155
												225	-		189	225				225	-	L	-	-		273	T	6	21.652		237	M	L	6	23.758		M	6	23.758		G	6	14.24		6	G	14.24	3	5.17241
												226	A		190	226	E	1		226	E	A	1	26.848		274	A	1	22.838		244	A	A	6	28.684		A	6	28.684		H	6	18.044		6	H	18.044	1	1.72414
												227	N		191	227	N	3		227	N	N	3	26.322		275	E	1	26.122		246	T	A	6	29.8		T	6	29.8		I	6	33.181		6	I	33.181
												228	H		192	228	H	5		228	H	H	5	22.576		276	Q	8	24.565		257	V	V	6	21.626		V	6	21.626		I	6	15.778		6	I	15.778	2	3.44828
												229	G		193	229	T	1		229	T	-	1	21.746		277	W	7	22.214		259	L	L	6	15.287		L	6	15.287		K	6	13.276		6	K	13.276	1	1.72414
												230	L		194	230	L	5		230	L	L	5	21.194		278	Q	1	24.978		270	I	I	6	15.778		I	6	15.778		L	6	15.287		6	L	15.287
												231	D		195	231	D	5		231	D	D	5	23.961		279	Q	2	26.989		273	T	T	6	21.652		T	6	21.652		L	6	16.481		6	L	16.481
												232	F		196	232	F	7		232	F	F	7	25.045		280	L	7	25.118		281	A	A	6	24.804		A	6	24.804		L	6	17.982		6	L	17.982
												233	D		197	233	D	5		233	D	D	5	28.292		281	A	6	24.804		292	G	G	6	29.107		G	6	29.107		L	6	14.884		6	L	14.884
												234	-		198	234	-	-		234	-	D	-	-		282	E	1	28.588		297	L	L	6	16.481		L	6	16.481		L	6	23.139		6	L	23.139
												235	-		199	235	-	-		235	-	'-	-	-		283	L	5	28.303		313	A	A	6	15.926		A	6	15.926		L	6	30.602		6	L	30.602	6	10.3448
												236	G		200	236	A	4		236	A	G	4	26.692		284	S	7	26.091		316	G	G	6	18.155		G	6	18.155		M	6	23.758		6	M	23.758	1	1.72414
												237	M		201	237	L	6		237	L	M	6	23.758		285	V	1	28.572		317	L	L	6	17.982		L	6	17.982		N	6	28.32		6	N	28.32
												238	L		202	238	I	3		238	I	L	3	26.314		290	E	1	31.285		318	R	R	6	20.991		R	6	20.991		N	6	17.412		6	N	17.412
												239	A		203	239	N	1		239	N	A	1	28.304		291	K	5	30.067		321	A	A	6	22.667		A	6	22.667		N	6	21.632		6	N	21.632
												240	S		204	240	S	5		240	S	S	5	26.628		292	G	6	29.107		333	A	A	6	11.584		A	6	11.584		N	6	12.48		6	N	12.48	4	6.89655
												241	L		205	241	L	8		241	L	L	8	24.159		294	W	7	25.487		351	T	T	6	17.536		T	6	17.536		P	6	22.296		6	P	22.296
												242	E		206	242	N	1		242	N	E	1	27.082		295	L	3	23.51		355	V	V	6	22.552		V	6	22.552		P	6	14.948		6	P	14.948
												243	A		207	243	E	1		243	E	A	1	28.899		296	P	7	19.839		356	A	A	6	25.764		A	6	25.764		P	6	15.504		6	P	15.504
												244	A		208	244	A	6		244	A	A	6	28.684		297	L	6	16.481		369	V	M	6	22.519		V	6	22.519		P	6	12.194		6	P	12.194	4	6.89655
												245	I		209	245	Q	4		245	Q	I	4	29.737		298	F	7	13.474		376	V	A	6	22.461		V	6	22.461		R	6	19.387		6	R	19.387
												246	A		210	246	A	6		246	A	T	6	29.8		299	D	9	9.674		380	N	N	6	21.632		N	6	21.632		R	6	14.816		6	R	14.816
												247	-		211	247	-	-		247	-	K	-	-		300	F	7	9.017		386	S	A	6	19.221		S	6	19.221		R	6	20.991		6	R	20.991	3	5.17241
												248	-		212	248	-	-		248	-	T	-	-		301	A	9	5.553		387	H	H	6	18.044		H	6	18.044		S	6	13.061		6	S	13.061
												249	-		213	249	-	-		249	-	L	-	-		302	Y	9	7.454		409	L	T	6	14.884		L	6	14.884		S	6	19.221		6	S	19.221
												250	-		214	250	-	-		250	-	H	-	-		303	Q	7	11.085		428	V	V	6	25.219		V	6	25.219		S	6	17.913		6	S	17.913	3	5.17241
												251	-		215	251	-	-		251	-	E	-	-		304	G	7	13.562		440	A	A	6	33.632		A	6	33.632		T	6	29.8		6	T	29.8
												252	-		216	252	-	-		252	-	-	-	-		305	F	7	12.029		444	F	F	6	25.819		F	6	25.819		T	6	21.652		6	T	21.652
												253	-		217	253	-	-		253	-	-	-	-		306	A	4	14.576		454	G	N	6	14.24		G	6	14.24		T	6	17.536		6	T	17.536
												254	P		218	254	-	-		254	-	P	-	-		307	Y	2	16.511		462	L	L	6	23.139		L	6	23.139		T	6	24.702		6	T	24.702	4	6.89655
												255	G		219	255	G	5		255	G	G	5	27.96		308	G	5	17.13		482	T	T	6	24.702		T	6	24.702		V	6	16.399		6	V	16.399
												256	D		220	256	D	8		256	D	D	8	25.119		309	L	4	15.4		505	S	S	6	17.913		S	6	17.913		V	6	14.415		6	V	14.415
												257	V		221	257	V	6		257	V	V	6	21.626		310	E	1	18.293		526	N	N	6	12.48		N	6	12.48		V	6	19.543		6	V	19.543
												258	V		222	258	V	7		258	V	V	7	18.824		311	E	1	19.559		528	A	A	6	12.832		A	6	12.832		V	6	21.626		6	V	21.626
												259	L		223	259	L	6		259	L	L	6	15.287		312	D	5	15.946		532	D	P	6	23.961		D	6	23.961		V	6	22.552		6	V	22.552
												260	L		224	260	P	5		260	F	L	5	14.909		313	A	6	15.926		546	L	L	6	30.602		L	6	30.602		V	6	22.519		6	V	22.519
												261	H		225	261	H	7		261	H	H	7	12.017		315	E	2	19.275												V	6	22.461		6	V	22.461
												262	G		226	262	G	9		262	G	G	9	11.861		316	G	6	18.155												V	6	25.219		6	V	25.219	8	13.7931
												263	C		227	263	C	8		263	C	C	8	13.158		317	L	6	17.982												58		20.208			58	20.208	58	100
												264	C		228	264	C	9		264	C	C	9	11.663		318	R	6	20.991		38	F	F	5	32.326		F	5	32.326								20.208±
												265	H		229	265	H	8		265	H	H	8	10.478		320	F	5	22.528		61	L	L	5	16.012		L	5	16.012								5.46985
												266	N		230	266	N	9		266	N	N	9	9.31		321	A	6	22.667		63	L	L	5	16.506		L	5	16.506
												267	P		231	267	P	9		267	P	P	9	11.226		322	A	1	26.426		66	A	L	5	21.379		A	5	21.379		A	5	21.379		5	A	21.379
												268	T		232	268	T	8		268	T	T	8	13.781		323	L	2	27.024		67	F	F	5	20.987		F	5	20.987		A	5	17.998		5	A	17.998
												269	G		233	269	G	9		269	G	G	9	13.26		324	H	3	26.135		68	R	R	5	23.525		R	5	23.525		A	5	15.561		5	A	15.561
												270	I		234	270	I	6		270	I	I	6	15.778		326	D	1	27.345		100	S	S	5	19.337		S	5	19.337		A	5	31.621		5	A	31.621	4	8.33333
												271	D		235	271	D	7		271	D	D	7	16.608		327	E	8	24.737		102	K	K	5	20.713		K	5	20.713		C	5	15.244		5	C	15.244	1	2.08333
												272	P		236	272	P	7		272	P	P	7	19.462		328	L	5	20.972		115	L	L	5	26.921		L	5	26.921		D	5	23.961		5	D	23.961
												273	T		237	273	T	6		273	T	T	6	21.652		331	I	5	17.763		141	Q	Q	5	19.283		Q	5	19.283		D	5	28.292		5	D	28.292
												274	A		238	274	L	1		274	L	A	1	22.838		332	V	7	14.465		146	G	G	5	22.523		G	5	22.523		D	5	15.946		5	D	15.946
												275	E		239	275	E	1		275	E	E	1	26.122		333	A	6	11.584		160	A	A	5	17.998		A	5	17.998		D	5	26.612		5	D	26.612	4	8.33333
												276	Q		240	276	Q	8		276	Q	Q	8	24.565		334	S	8	9.569		175	F	F	5	22.075		F	5	22.075		E	5	18.014		5	E	18.014	1	2.08333
												277	W		241	277	W	7		277	W	W	7	22.214		335	S	9	7.249		178	T	K	5	27.069		T	5	27.069		F	5	32.326		5	F	32.326
												278	Q		242	278	Q	1		278	Q	Q	1	24.978		336	Y	7	8.469		184	N	T	5	27.062		N	5	27.062		F	5	20.987		5	F	20.987
												279	Q		243	279	T	2		279	T	Q	2	26.989		337	S	9	6.344		186	G	V	5	25.406		G	5	25.406		F	5	22.075		5	F	22.075
												280	L		244	280	L	7		280	L	L	7	25.118		338	K	9	5.718		201	A	S	5	15.561		A	5	15.561		F	5	22.528		5	F	22.528	4	8.33333
												281	A		245	281	A	6		281	A	A	6	24.804		339	N	8	9.205		228	H	H	5	22.576		H	5	22.576		G	5	22.523		5	G	22.523
												282	E		246	282	Q	1		282	Q	E	1	28.588		340	F	7	10.844		230	L	L	5	21.194		L	5	21.194		G	5	25.406		5	G	25.406
												283	L		247	283	L	5		283	L	L	5	28.303		341	G	7	9.979		231	D	D	5	23.961		D	5	23.961		G	5	27.96		5	G	27.96
												284	S		248	284	S	7		284	S	S	7	26.091		342	L	8	10.169		233	D	D	5	28.292		D	5	28.292		G	5	17.13		5	G	17.13	4	8.33333
												285	V		249	285	V	1		285	V	V	1	28.572		343	Y	9	7.869		240	S	S	5	26.628		S	5	26.628		H	5	22.576		5	H	22.576	1	2.08333
												286	-		250	286	-	-		286	-	T	-	-		344	G	9	11.1		255	G	G	5	27.96		G	5	27.96		I	5	17.763		5	I	17.763
												287	-		251	287	-	-		287	-	I	-	-		345	E	7	13.127		260	L	F	5	14.909		L	5	14.909		I	5	20.831		5	I	20.831
												288	-		252	288	-	-		288	-	A	-	-		346	R	9	11.078		283	L	L	5	28.303		L	5	28.303		I	5	20.185		5	I	20.185
												289	-		253	289	-	-		289	-	Q	-	-		347	V	7	10.793		291	K	K	5	30.067		K	5	30.067		I	5	19.678		5	I	19.678	4	8.33333
												290	E		254	290	K	1		290	E	E	1	31.285		348	G	9	10.383		308	G	G	5	17.13		G	5	17.13		K	5	20.713		5	K	20.713
												291	K		255	291	K	5		291	K	K	5	30.067		349	A	7	13.292		312	D	D	5	15.946		D	5	15.946		K	5	30.067		5	K	30.067	2	4.16667
												292	G		256	292	G	6		292	G	G	6	29.107		350	C	5	15.244		320	F	F	5	22.528		F	5	22.528		L	5	16.012		5	L	16.012
												293	H		257	293	-	-		293	-	H	-	'-		351	T	6	17.536		328	L	L	5	20.972		L	5	20.972		L	5	16.506		5	L	16.506
												294	W		258	294	W	7		294	W	W	7	25.487		354	L	2	20.265		331	I	I	5	17.763		I	5	17.763		L	5	26.921		5	L	26.921
												295	L		259	295	L	3		295	L	L	3	23.51		355	V	6	22.552		350	C	C	5	15.244		C	5	15.244		L	5	21.194		5	L	21.194
												296	P		260	296	P	7		296	P	P	7	19.839		356	A	6	25.764		367	S	S	5	27.358		S	5	27.358		L	5	14.909		5	L	14.909
												297	L		261	297	L	6		297	L	L	6	16.481		357	A	1	28.966		368	Q	Q	5	26.202		Q	5	26.202		L	5	28.303		5	L	28.303
												298	F		262	298	F	7		298	F	F	7	13.474		358	G	4	31.025		377	I	I	5	20.831		I	5	20.831		L	5	20.972		5	L	20.972	7	14.5833
												299	D		263	299	D	9		299	D	D	9	9.674		359	P	4	30.666		395	I	I	5	20.185		I	5	20.185		M	5	23.948		5	M	23.948	1	2.08333
												300	F		264	300	F	7		300	F	F	7	9.017		360	A	1	32.504		399	D	D	5	26.612		D	5	26.612		N	5	27.062		5	N	27.062
												301	A		265	301	A	9		301	A	A	9	5.553		361	T	1	30.49		406	E	E	5	18.014		E	5	18.014		N	5	28.066		5	N	28.066
												302	Y		266	302	Y	9		302	Y	Y	9	7.454		362	A	4	27.079		410	T	T	5	17.361		T	5	17.361		N	5	32.981		5	N	32.981	3	6.25
												303	Q		267	303	Q	7		303	Q	Q	7	11.085		364	K	4	29.344		415	Q	Q	5	18.569		Q	5	18.569		Q	5	19.283		5	Q	19.283
												304	G		268	304	G	7		304	G	G	7	13.562		365	A	1	26.891		429	N	N	5	28.066		N	5	28.066		Q	5	26.202		5	Q	26.202
												305	F		269	305	F	7		305	F	F	7	12.029		366	F	7	24.766		441	N	N	5	32.981		N	5	32.981		Q	5	18.569		5	Q	18.569
												306	A		270	306	A	4		306	A	A	4	14.576		367	S	5	27.358		445	S	S	5	25.414		S	5	25.414		Q	5	26.128		5	Q	26.128	4	8.33333
												307	R		271	307	R	2		307	R	Y	2	16.511		368	Q	5	26.202		448	I	I	5	19.678		I	5	19.678		R	5	23.525		5	R	23.525	1	2.08333
												308	G		272	308	G	5		308	G	G	5	17.13		369	V	6	22.519		485	Q	Q	5	26.128		Q	5	26.128		S	5	19.337		5	S	19.337
												309	L		273	309	L	4		309	L	L	4	15.4		370	A	4	23.941		531	T	T	5	20.403		T	5	20.403		S	5	26.628		5	S	26.628
												310	E		274	310	E	1		310	E	E	1	18.293		371	S	7	25.442		535	M	M	5	23.948		M	5	23.948		S	5	27.358		5	S	27.358
												311	E		275	311	E	1		311	E	E	1	19.559		376	V	6	22.461		544	A	A	5	31.621		A	5	31.621		S	5	25.414		5	S	25.414	4	8.33333
												312	D		276	312	D	5		312	D	D	5	15.946		377	I	5	20.831												T	5	27.069		5	T	27.069
												313	A		277	313	A	6		313	A	A	6	15.926		378	R	8	24.067												T	5	17.361		5	T	17.361
												314	-		278	314	-	-		314	-	-	-	-		379	A	9	24.405												T	5	20.403		5	T	20.403	3	6.25
												315	E		279	315	E	2		315	E	E	2	19.275		380	N	6	21.632		43	A	A	4	27.2		A	4	27.2		48		22.74			48	22.74	48	100
												316	G		280	316	G	6		316	G	G	6	18.155		381	Y	7	20.507		62	G	G	4	16.789		G	4	16.789								22.740±
												317	L		281	317	L	6		317	L	L	6	17.982		382	S	8	23.073		65	D	D	4	17.668		D	4	17.668								4.84817
												318	R		282	318	R	6		318	R	R	6	20.991		383	N	9	21.684		129	P	G	4	24.554		P	4	24.554
												319	A		283	319	A	3		319	A	-	3	22.7		384	P	7	18.41		144	L	L	4	16.535		L	4	16.535		A	4	27.2		4	A	27.2
												320	F		284	320	F	5		320	F	F	5	22.528		385	P	8	18.008		149	S	S	4	27.359		S	4	27.359		A	4	23.618		4	A	23.618
												321	A		285	321	A	6		321	A	A	6	22.667		386	S	6	19.221		156	R	R	4	27.054		R	4	27.054		A	4	14.576		4	A	14.576
												322	A		286	322	A	1		322	A	A	1	26.426		387	H	6	18.044		158	R	R	4	22.83		R	4	22.83		A	4	27.079		4	A	27.079
												323	L		287	323	L	2		323	M	L	2	27.024		388	G	8	14.718		176	L	L	4	22.616		L	4	22.616		A	4	23.941		4	A	23.941	5	16.6667
												324	H		288	324	H	3		324	H	H	3	26.135		389	A	7	15.789		183	L	N	4	28.337		L	4	28.337		D	4	17.668		4	D	17.668	1	3.33333
												325	-		289	325	-	-		325	-	I	-	-		390	A	9	19.155		200	P	K	4	15.581		P	4	15.581		E	4	29.497		4	E	29.497	1	3.33333
												326	D		290	326	D	1		326	K	D	1	27.345		391	A	2	17.759		214	V	R	4	21.484		V	4	21.484		F	4	28.089		4	F	28.089	1	3.33333
												327	E		291	327	E	8		327	E	E	8	24.737		392	V	7	15.915		218	Y	Y	4	19.352		Y	4	19.352		G	4	16.789		4	G	16.789
												328	L		292	328	L	5		328	L	L	5	20.972		393	A	8	19.225		221	A	A	4	23.618		A	4	23.618		G	4	26.692		4	G	26.692
												329	-		293	329	-	-		329	-	A	-	-		394	T	4	21.402		236	G	A	4	26.692		G	4	26.692		G	4	31.025		4	G	31.025
												330	-		294	330	-	-		330	-	A	-	-		395	I	5	20.185		245	I	Q	4	29.737		I	4	29.737		G	4	25.699		4	G	25.699	4	13.3333
												331	I		295	331	I	5		331	I	I	5	17.763		396	L	8	20.468		306	A	A	4	14.576		A	4	14.576		I	4	29.737		4	I	29.737
												332	V		296	332	V	7		332	V	V	7	14.465		397	S	8	23.891		309	L	L	4	15.4		L	4	15.4		I	4	20.262		4	I	20.262	2	6.66667
												333	A		297	333	A	6		333	A	A	6	11.584		398	N	1	25.344		358	G	D	4	31.025		G	4	31.025		K	4	29.344		4	K	29.344	1	3.33333
												334	S		298	334	S	8		334	S	S	8	9.569		399	D	5	26.612		359	P	S	4	30.666		P	4	30.666		L	4	16.535		4	L	16.535
												335	S		299	335	S	9		335	S	S	9	7.249		400	A	1	26.415		362	A	V	4	27.079		A	4	27.079		L	4	22.616		4	L	22.616
												336	Y		300	336	Y	7		336	Y	Y	7	8.469		401	L	3	23.05		364	K	R	4	29.344		K	4	29.344		L	4	28.337		4	L	28.337
												337	S		301	337	S	9		337	S	S	9	6.344		402	R	7	20.537		370	A	K	4	23.941		A	4	23.941		L	4	15.4		4	L	15.4
												338	K		302	338	K	9		338	K	K	9	5.718		403	A	3	22.844		394	T	T	4	21.402		T	4	21.402		L	4	25.593		4	L	25.593	5	16.6667
												339	N		303	339	N	8		339	N	N	8	9.205		404	I	1	21.822		451	I	I	4	20.262		I	4	20.262		P	4	24.554		4	P	24.554
												340	F		304	340	F	7		340	F	F	7	10.844		405	W	1	18.092		453	Q	Q	4	17.001		Q	4	17.001		P	4	15.581		4	P	15.581
												341	G		305	341	G	7		341	G	G	7	9.979		406	E	5	18.014		489	L	L	4	25.593		L	4	25.593		P	4	30.666		4	P	30.666	3	10
												342	L		306	342	L	8		342	L	L	8	10.169		407	Q	3	19.717		498	F	F	4	28.089		F	4	28.089		Q	4	17.001		4	Q	17.001	1	3.33333
												343	Y		307	343	Y	9		343	Y	Y	9	7.869		408	E	1	17.688		499	G	G	4	25.699		G	4	25.699		R	4	27.054		4	R	27.054
												344	G		308	344	G	9		344	N	G	9	11.1		409	L	6	14.884		540	E	E	4	29.497		E	4	29.497		R	4	22.83		4	R	22.83	2	6.66667
												345	E		309	345	E	7		345	E	E	7	13.127		410	T	5	17.361												S	4	27.359		4	S	27.359	1	3.33333
												346	R		310	346	R	9		346	R	R	9	11.078		411	E	1	17.82												T	4	21.402		4	T	21.402	1	3.33333
												347	V		311	347	V	7		347	V	V	7	10.793		412	M	3	14.279												V	4	21.484		4	V	21.484	1	3.33333
												348	G		312	348	G	9		348	G	G	9	10.383		414	R	7	14.869		39	E	E	3	33.795		E	3	33.795		Y	4	19.352		4	Y	19.352	1	3.33333
												349	A		313	349	A	7		349	A	A	7	13.292		415	Q	5	18.569		69	A	A	3	25.384		A	3	25.384		30		23.566			30	23.566	30	100
												350	C		314	350	C	5		350	C	C	5	15.244		416	R	1	17.494		131	D	D	3	21.281		D	3	21.281								23.566±
												351	T		315	351	T	6		351	T	T	6	17.536		420	I	9	15.156		135	E	E	3	22.45		E	3	22.45								5.08957
												352	-		316	352	-	-		352	-	Y	-	-		421	Q	9	17.781		145	F	F	3	19.831		F	3	19.831
												353	-		317	353	-	-		353	-	G	-	-		422	R	3	20.27		207	A	S	3	19.032		A	3	19.032		A	3	25.384		3	A	25.384
												354	L		318	354	L	2		354	L	L	2	20.265		423	M	1	19.196		220	D	D	3	23.596		D	3	23.596		A	3	19.032		3	A	19.032
												355	V		319	355	V	6		355	V	V	6	22.552		424	R	7	19.744		227	N	N	3	26.322		N	3	26.322		A	3	22.844		3	A	22.844	3	17.6471
												356	A		320	356	A	6		356	A	A	6	25.764		425	Q	8	23.268		238	L	I	3	26.314		L	3	26.314		D	3	21.281		3	D	21.281
												357	A		321	357	A	1		357	A	A	1	28.966		426	L	2	23.974		295	L	L	3	23.51		L	3	23.51		D	3	23.596		3	D	23.596	2	11.7647
												358	D		322	358	D	4		358	D	G	4	31.025		427	F	1	22.933		324	H	H	3	26.135		H	3	26.135		E	3	33.795		3	E	33.795
												359	P		323	359	P	4		359	S	P	4	30.666		428	V	6	25.219		401	L	L	3	23.05		L	3	23.05		E	3	22.45		3	E	22.45	2	11.7647
												360	E		324	360	E	1		360	E	A	1	32.504		429	N	5	28.066		403	A	A	3	22.844		A	3	22.844		F	3	19.831		3	F	19.831	1	5.88235
												361	T		325	361	T	1		361	T	T	1	30.49		430	T	1	28.089		407	Q	E	3	19.717		Q	3	19.717		H	3	26.135		3	H	26.135	1	5.88235
												362	A		326	362	A	4		362	V	A	4	27.079		431	L	2	29.06		412	M	M	3	14.279		M	3	14.279		L	3	26.314		3	L	26.314
												363	D		327	363	D	4		363	D		4	28.698		433	E	8	32.558		422	R	R	3	20.27		R	3	20.27		L	3	23.51		3	L	23.51
												364	R		328	364	R	1		364	R	K	1	29.344		438	K	1	32.159		500	V	V	3	22.711		V	3	22.711		L	3	23.05		3	L	23.05	3	17.6471
												365	A		329	365	A	7		365	A	A	7	26.891		439	G	1	31.49												M	3	14.279		3	M	14.279	1	5.88235
												366	F		330	366	F	5		366	F	F	5	24.766		440	A	6	33.632												N	3	26.322		3	N	26.322	1	5.88235
												367	S		331	367	S	5		367	S	S	5	27.358		441	N	5	32.981												Q	3	19.717		3	Q	19.717	1	5.88235
												368	Q		332	368	Q	6		368	Q	Q	6	26.202		442	Q	1	30.667		74	D	G	2	25.169		G	2	25.169		R	3	20.27		3	R	20.27	1	5.88235
												369	V		333	369	V	4		369	M	V	4	22.519		443	D	1	28.969		92	T	T	2	20.817		T	2	20.817		V	3	22.711		3	V	22.711	1	5.88235
												370	K		334	370	K	7		370	K	A	7	23.941		444	F	6	25.819		99	T	Y	2	20.051		Y	2	20.051		17		22.972			17	22.972	17	100
												371	S		335	371	S	6		371	A	S	6	25.442		445	S	5	25.414		109	K	K	2	23.107		K	2	23.107								22.972±
												372	-		336	372	-	-		372	-	K	-	-		447	F	2	22.809		112	Q	Q	2	25.558		Q	2	25.558								4.04465
												373	-		337	373	-	-		373	-	T	-	-		448	I	5	19.678		119	T	T	2	31.225		T	2	31.225
												374	-		338	374	-	-		374	-	A	-	-		451	I	4	20.262		133	I	I	2	21.586		I	2	21.586		E	2	19.275		2	E	19.275	1	5
												375	-		339	375	-	-		375	-	G	-	-		452	P	1	20.453		134	P	P	2	23.058		P	2	23.058		F	2	22.809		2	F	22.809	1	5
												376	I		340	376	I	5		376	A	V	5	22.461		453	Q	4	17.001		151	L	L	2	26.075		L	2	26.075		G	2	25.169		2	G	25.169	1	5
												377	I		341	377	I	8		377	I	I	8	20.831		454	G	6	14.24		152	I	I	2	25.765		I	2	25.765		I	2	21.586		2	I	21.586
												378	R		342	378	R	9		378	R	R	9	24.067		455	G	8	11.15		279	Q	T	2	26.989		T	2	26.989		I	2	25.765		2	I	25.765	2	10
												379	A		343	379	A	6		379	A	A	6	24.405		456	M	9	10.837		307	Y	R	2	16.511		R	2	16.511		K	2	23.107		2	K	23.107	1	5
												380	N		344	380	N	7		380	N	N	7	21.632		457	F	8	11.188		315	E	E	2	19.275		E	2	19.275		L	2	26.075		2	L	26.075
												381	Y		345	381	Y	8		381	Y	Y	8	20.507		458	S	9	14.631		323	L	M	2	27.024		M	2	27.024		L	2	20.265		2	L	20.265
												382	S		346	382	S	9		382	S	S	9	23.073		459	F	7	16.336		354	L	L	2	20.265		L	2	20.265		L	2	23.974		2	L	23.974
												383	N		347	383	N	7		383	N	N	7	21.684		460	S	7	19.227		391	A	V	2	17.759		V	2	17.759		L	2	29.06		2	L	29.06	4	20
												384	P		348	384	P	8		384	P	P	8	18.41		461	G	7	22.518		426	L	L	2	23.974		L	2	23.974		M	2	27.024		2	M	27.024	1	5
												385	P		349	385	P	6		385	P	P	6	18.008		462	L	6	23.139		431	L	L	2	29.06		L	2	29.06		P	2	23.058		2	P	23.058
												386	A		350	386	A	6		386	A	S	6	19.221		482	T	6	24.702		447	F	F	2	22.809		F	2	22.809		P	2	27.321		2	P	27.321	2	10
												387	H		351	387	H	8		387	H	H	8	18.044		483	K	7	23.837		537	P	P	2	27.321		P	2	27.321		Q	2	25.558		2	Q	25.558	1	5
												388	G		352	388	G	7		388	G	G	7	14.718		484	E	1	26.638												R	2	16.511		2	R	16.511	1	5
												389	A		353	389	A	9		389	A	A	9	15.789		485	Q	5	26.128												T	2	20.817		2	T	20.817
												390	A		354	390	A	2		390	S	A	2	19.155		486	V	7	22.749												T	2	31.225		2	T	31.225
												391	A		355	391	A	7		391	V	A	7	17.759		487	L	7	25.063		40	N	N	1	34.136		N	1	34.136		T	2	26.989		2	T	26.989	3	15
												392	V		356	392	V	8		392	V	V	8	15.915		488	R	1	28.217		42	T	T	1	29.579		T	1	29.579		V	2	17.759		2	V	17.759	1	5
												393	A		357	393	A	4		393	A	A	4	19.225		489	L	4	25.593		71	E	E	1	29.53		E	1	29.53		Y	2	20.051		2	Y	20.051	1	5
												394	T		358	394	T	5		394	T	T	5	21.402		490	L	8	24.666		73	P	P	1	28.42		P	1	28.42		20		23.67			20	23.67	20	100
												395	I		359	395	I	8		395	I	I	8	20.185		496	E	8	28.384		113	Y	Y	1	26.226		Y	1	26.226								3.85197
												396	L		360	396	L	8		396	L	L	8	20.468		497	E	1	30.826		116	E	E	1	30.181		E	1	30.181
												397	S		361	397	S	1		397	S	S	1	23.891		498	F	4	28.089		117	N	N	1	29.652		N	1	29.652		A	1	26.848
												398	N		362	398	N	5		398	N	N	5	25.344		499	G	4	25.699		138	R	R	1	22.119		R	1	22.119		A	1	28.304		1	A	26.848
												399	D		363	399	D	1		399	D	D	1	26.612		500	V	3	22.711		142	E	E	1	20.805		E	1	20.805		A	1	28.899		1	A	28.304
												400	A		364	400	A	3		400	A	A	3	26.415		501	Y	8	19.32		147	K	K	1	24.949		K	1	24.949		A	1	22.838		1	A	28.899
												401	L		365	401	L	7		401	L	L	7	23.05		502	A	8	17.285		148	D	G	1	28.42		D	1	28.42		A	1	26.426		1	A	22.838
												402	R		366	402	R	3		402	R	R	3	20.537		503	V	7	15.881		150	G	A	1	28.867		G	1	28.867		A	1	28.966		1	A	26.426
												403	A		367	403	A	1		403	A	A	1	22.844		504	P	8	18.758		153	Y	N	1	29.578		Y	1	29.578		A	1	32.504		1	A	28.966
												404	I		368	404	I	1		404	I	I	1	21.822		505	S	6	17.913		154	D	D	1	30.244		D	1	30.244		A	1	26.891		1	A	32.504
												405	W		369	405	W	5		405	W	W	5	18.092		513	G	9	18.556		155	K	K	1	28.075		K	1	28.075		A	1	26.415		1	A	26.891
												406	E		370	406	E	3		406	E	E	3	18.014		524	R	9	14.862		185	P	S	1	28.499		P	1	28.499		A	1	27.883		1	A	26.415
												407	Q		371	407	Q	1		407	E	Q	1	19.717		525	I	9	14.35		206	N	N	1	19.865		N	1	19.865		D	1	28.42		1	A	27.883	10
												408	E		372	408	E	6		408	L	E	6	17.688		526	N	6	12.48		212	E	E	1	21.885		E	1	21.885		D	1	30.244		1	D	28.42
												409	L		373	409	L	5		409	T	L	5	14.884		527	V	8	14.471		215	E	E	1	19.974		E	1	19.974		D	1	27.345		1	D	30.244
												410	T		374	410	T	1		410	T	T	1	17.361		528	A	6	12.832		217	P	A	1	22.216		P	1	22.216		D	1	28.969		1	D	27.345
												411	E		375	411	E	3		411	D	E	3	17.82		529	G	9	14.984		219	Y	Y	1	19.953		Y	1	19.953		D	1	25.472		1	D	28.969
												412	M		376	412	M	7		412	M	M	7	14.279		530	M	8	17.858		226	A	E	1	26.848		A	1	26.848		E	1	29.53		1	D	25.472	5
												413	-		377	413	-	-		413	-	-	-	-		531	T	5	20.403		239	A	N	1	28.304		A	1	28.304		E	1	30.181		1	E	29.53
												414	R		378	414	R	5		414	R	R	5	14.869		532	D	6	23.961		242	E	N	1	27.082		E	1	27.082		E	1	20.805		1	E	30.181
												415	Q		379	415	Q	1		415	Q	Q	1	18.569		533	D	1	25.472		243	A	E	1	28.899		A	1	28.899		E	1	21.885		1	E	20.805
												416	R		380	416	R	9		416	R	R	9	17.494		534	N	1	23.227		274	A	L	1	22.838		A	1	22.838		E	1	19.974		1	E	21.885
												417	-		381	417	-	-		417	-	G	-	-		535	M	5	23.948		275	E	E	1	26.122		E	1	26.122		E	1	27.082		1	E	19.974
												418	-		382	418	-	-		418	-	G	-	-		536	E	7	27.575		278	Q	Q	1	24.978		Q	1	24.978		E	1	26.122		1	E	27.082
												419	-		383	419	-	-		419	-	R	-	-		537	P	2	27.321		282	E	Q	1	28.588		E	1	28.588		E	1	28.588		1	E	26.122
												420	I		384	420	I	9		420	I	I	9	15.156		538	L	1	24.515		285	V	V	1	28.572		V	1	28.572		E	1	31.285		1	E	28.588
												421	Q		385	421	Q	3		421	Q	Q	3	17.781		539	C	8	26.534		290	E	E	1	31.285		E	1	31.285		E	1	18.293		1	E	31.285
												422	R		386	422	R	1		422	R	R	1	20.27		540	E	4	29.497		310	E	E	1	18.293		E	1	18.293		E	1	19.559		1	E	18.293
												423	M		387	423	M	7		423	M	M	7	19.196		541	A	1	27.883		311	E	E	1	19.559		E	1	19.559		E	1	17.688		1	E	19.559
												424	R		388	424	R	8		424	R	R	8	19.744		542	I	8	26.663		322	A	A	1	26.426		A	1	26.426		E	1	17.82		1	E	17.688
												425	Q		389	425	Q	2		425	Q	Q	2	23.268		543	V	8	30.16		326	D	K	1	27.345		D	1	27.345		E	1	26.638		1	E	17.82
												426	L		390	426	L	1		426	L	L	1	23.974		544	A	5	31.621		357	A	A	1	28.966		A	1	28.966		E	1	30.826		1	E	26.638
												427	F		391	427	F	6		427	F	F	6	22.933		545	V	1	29.651		360	A	E	1	32.504		A	1	32.504		F	1	22.933		1	E	30.826	15
												428	V		392	428	V	5		428	V	V	5	25.219		546	L	6	30.602		361	T	T	1	30.49		T	1	30.49		G	1	28.867		1	F	22.933	1
												429	N		393	429	N	1		429	N	N	1	28.066			392				365	A	A	1	26.891		A	1	26.891		G	1	31.49		1	G	28.867
												430	T		394	430	T	2		430	T	T	2	28.089							398	N	N	1	25.344		N	1	25.344		I	1	21.822		1	G	31.49	2
												431	L		395	431	L	8		431	L	L	8	29.06							400	A	A	1	26.415		A	1	26.415		K	1	24.949		1	I	21.822	1
												432	Q		396	432	Q	2		432	Q	-	2	31.358							404	I	I	1	21.822		I	1	21.822		K	1	28.075		1	K	24.949
												433	E		397	433	E	1		433	E	E	1	32.558							405	W	W	1	18.092		W	1	18.092		K	1	32.159		1	K	28.075
												434	-		398	434	-	-		434	'-	Y	-	-							408	E	L	1	17.688		E	1	17.688		L	1	24.515		1	K	32.159	3
												435	-		399	435	-	-		435	'-	K	-	-							411	E	D	1	17.82		E	1	17.82		M	1	19.196		1	L	24.515	1
												436	-		400	436	-	-		436	'-	N	-	-							416	R	R	1	17.494		R	1	17.494		N	1	34.136		1	M	19.196	1
												437	-		401	437	-	-		437	'-	S	-	-							423	M	M	1	19.196		M	1	19.196		N	1	29.652		1	N	34.136
												438	K		402	438	K	1		438	K	K	1	32.159							427	F	F	1	22.933		F	1	22.933		N	1	19.865		1	N	29.652
												439	G		403	439	G	6		439	G	G	6	31.49							430	T	T	1	28.089		T	1	28.089		N	1	25.344		1	N	19.865
												440	A		404	440	A	5		440	A	A	5	33.632							438	K	K	1	32.159		K	1	32.159		N	1	23.227		1	N	25.344
												441	N		405	441	N	1		441	N	N	1	32.981							439	G	G	1	31.49		G	1	31.49		P	1	28.42		1	N	23.227	5
												442	Q		406	442	Q	1		442	R	Q	1	30.667							442	Q	R	1	30.667		Q	1	30.667		P	1	28.499		1	P	28.42
												443	D		407	443	D	6		443	D	D	6	28.969							443	D	D	1	28.969		D	1	28.969		P	1	22.216		1	P	28.499
												444	F		408	444	F	5		444	F	F	5	25.819							452	P	K	1	20.453		P	1	20.453		P	1	20.453		1	P	22.216
												445	S		409	445	S	2		445	S	S	2	25.414							484	E	E	1	26.638		E	1	26.638		Q	1	24.978		1	P	20.453	4
												446	I		410	446	I	-		446	-	-	-	-							488	R	R	1	28.217		R	1	28.217		Q	1	30.667		1	Q	24.978
												447	F		411	447	F	5		447	F	F	5	22.809							497	E	E	1	30.826		E	1	30.826		R	1	22.119		1	Q	30.667	2
												448	I		412	448	I	4		448	I	I	4	19.678							533	D	D	1	25.472		D	1	25.472		R	1	17.494		1	R	22.119
												449	-		413	449	-	-		449	-	I	-								534	N	N	1	23.227		N	1	23.227		R	1	28.217		1	R	17.494
												450	-		414	450	-	-		450	-	H	-	-							538	L	L	1	24.515		L	1	24.515		T	1	29.579		1	R	28.217	3
												451	I		415	451	I	1		451	I	I	1	20.262							541	A	A	1	27.883		A	1	27.883		T	1	30.49		1	T	29.579
												452	P		416	452	P	4		452	K	P	4	20.453							545	V	V	1	29.651		V	1	29.651		T	1	28.089		1	T	30.49
												453	Q		417	453	Q	6		453	Q	Q	6	17.001								392					392				V	1	28.572		1	T	28.089	3
												454	N		418	454	N	8		454	N	G	8	14.24																	V	1	29.651		1	V	28.572
												455	G		419	455	G	9		455	G	G	9	11.15																	W	1	18.092		1	V	29.651	2
												456	M		420	456	M	8		456	M	M	8	10.837																	Y	1	26.226		1	W	18.092	1
												457	F		421	457	F	9		457	F	F	9	11.188																	Y	1	29.578		1	Y	26.226
												458	S		422	458	S	7		458	S	S	7	14.631																	Y	1	19.953		1	Y	29.578
												459	F		423	459	F	7		459	F	F	7	16.336																	62		26.004		1	Y	19.953	3
												460	S		424	460	S	7		460	S	S	7	19.227																	392					62	26.004	62
												461	G		425	461	G	6		461	G	G	6	22.518																					392		26.004±
												462	L		426	462	L	6		462	L	L	6	23.139																							4.33344
												463	-		427	463	-	-		463	-	-	-	-
												464	A		428	464	A	-		464	-	A	-	-
												465	G		429	465	G	-		465	-	G	-	-
												466	L		430	466	L	-		466	-	LI	-	-
												467	I		431	467	I	-		467	-	I	-	-
												468	G		432	468	G	-		468	-	G	-	-
												469	K		433	469	K	-		469	-	K	-	-
												470	K		434	470	K	-		470	-	K	-	-
												471	T		435	471	T	-		471	-	T	-	-
												472	P		436	472	P	-		472	-	P	-	-
												473	A		437	473	A	-		473	-	A	-	-
												474	I		438	474	I	-		474	-	I	-	-
												475	R		439	475	R	-		475	-	-	-	-
												476	G		440	476	G	-		476	-	G	-	-
												477	K		441	477	K	-		477	-	K	-	-
												478	V		442	478	V	-		478	-	V	-	-
												479	I		443	479	I	-		479	-	I	-	-
												480	E		444	480	E	-		480	-	E	-	-
												481	D		445	481	D	-		481	-	D	-	-
												482	T		446	482	T	7		482	T	T	7	24.702
												483	K		447	483	K	1		483	K	K	1	23.837
												484	E		448	484	E	5		484	E	E	5	26.638
												485	Q		449	485	Q	7		485	Q	Q	7	26.128
												486	V		450	486	V	7		486	V	V	7	22.749
												487	L		451	487	L	1		487	L	L	1	25.063
												488	R		452	488	R	4		488	R	R	4	28.217
												489	L		453	489	L	8		489	L	L	8	25.593
												490	R		454	490	R	8		490	R	L	8	24.666
												491	-		455	491	-	-		491	-	T	-	-
												492	-		456	492	-			492	-	D	-	-
												493	-		457	493	-			493	-	F	-	-
												494	-		458	494	-			494	-	E	-	-
												495	-		459	495	-			495	-	D	-	-
												496	E		460	496	E	1		496	E	E	1	28.384
												497	E		461	497	E	4		497	E	E	4	30.826
												498	F		462	498	F	4		498	F	F	4	28.089
												499	G		463	499	G	3		499	G	G	3	25.699
												500	V		464	500	V	8		500	V	V	8	22.711
												501	Y		465	501	Y	8		501	Y	Y	8	19.32
												502	A		466	502	A	7		502	A	A	7	17.285
												503	V		467	503	V	8		503	V	V	8	15.881
												504	P		468	504	P	6		504	A	P	6	18.758
												505	S		469	505	S	9		505	S	S	9	17.913
												506	S		470	506	S	-		506	-	S	-	-
												507	A		471	507	A	-		507	-	A	-	-
												508	F		472	508	F	-		508	-	F	-	-
												509	-		473	509	-	-		509	-	F	-	-
												510	P		474	510	P	-		510	-	P	-	-
												511	-		475	511	-	-		511	-	G	-	-
												512	-		476	512	-	-		512	-	L	-	-
												513	G		477	513	G	9		513	G	G	9	18.556
												514	-		478	514	-	-		514	-	-	-	-
												515	L		479	515	L	-		515	-	L	-	-
												516	N		480	516	N	-		516	-	N	-	-
												517	A		481	517	A	-		517	-	A	-	-
												518	G		482	518	G	-		518	-	G	-	-
												519	G		483	519	G	-		519	-	G	-	-
												520	H		484	520	H	-		520	-	H	-	-
												521	D		485	521	D	-		521	-	D	-	-
												522	H		486	522	H	-		522	-	H	-	-
												523	F		487	523	F	-		523	-	F	-	-
												524	R		488	524	R	9		524	R	R	9	14.862
												525	I		489	525	I	6		525	V	I	6	14.35
												526	N		490	526	N	8		526	N	N	8	12.48
												527	V		491	527	V	6		527	V	V	6	14.471
												528	A		492	528	A	9		528	A	A	9	12.832
												529	G		493	529	G	8		529	G	G	8	14.984
												530	M		494	530	M	5		530	M	M	5	17.858
												531	T		495	531	T	6		531	T	T	6	20.403
												532	P		496	532	P	1		532	P	D	1	23.961
												533	D		497	533	D	1		533	D	D	1	25.472
												534	N		498	534	N	5		534	N	N	5	23.227
												535	M		499	535	M	7		535	M	M	7	23.948
												536	A		500	536	A	2		536	A	E	2	27.575
												537	P		501	537	P	1		537	P	P	1	27.321
												538	L		502	538	L	8		538	L	L	8	24.515
												539	C		503	539	C	4		539	C	C	4	26.534
												540	E		504	540	E	1		540	E	E	1	29.497
												541	A		505	541	A	8		541	A	A	8	27.883
												542	I		506	542	I	8		542	I	I	8	26.663
												543	V		507	543	V	5		543	V	V	5	30.16
												544	A		508	544	A	1		544	A	A	1	31.621
												545	V		509	545	V	6		545	V	V	6	29.651
												546	L		510	546	L	5		546	L	L	5	30.602
												547	A		511	547	A	-		547	-	A	-	-
												548	R		512	548	R	-		548	-	L	-	-
												549	L		513	549	L	-		549	-	S	-	-
												550	R		514	550	R	-		550	-	R	-	-
												551	A		515	551	A	-		551	-	-	-	-
												552	V		516	552	V	-		552	-	-	-	-
												553	D		517	553	D	-		553	-	-	-	-
												554	A		518	554	A	-		554	-	E	-	-
												555	A		519	555	A	-		555	-	A	-	-
												556	I		520	556	I	-		556	-	-	-	-
																	A	-		557	-	A	-	-
																	S	-		558	-	S	-	-
																	I	-		559	-	I	-	-
																	E	-		560	-	E	-	-
																	A	-		561	-	A	-	-
																	E	-		562	-	E	-	-
																	K	-		563	-	K	-	-
																	A	-		564	-	A	-	-
																	A	-		565	-	K	-	-
																	K	-
																											G
																																G					G
																						G
